# Supplementary material
Source: publisher site journal article supplement (https://www.dovepress.com/article/454895)
Supplement: Supplementary file 1 [file get_supplementary_file.php]

**Supplementary material A：The complete questionnaire in English**

**general information**

1. Your City:

2.Your Hospital：

3. Your Academic degree：

□Doctorate degree □Master’s degree □Bachelor’s degree □Other’s degree

4.Your Professional title：

□Chief physicians □Associate chief physicians

□Attending physicians □Residents

5. Your Hospital classification：

□Tier 3 □Tier 2 □Tier 1

6. Your Working years：

□1-5 □6-10 □11-15 □16-20 □21-30 □＞30

7. Your Access to knowledge of malignant hyperthermia：

□Internet □Books □Literatures □Lectures □News reports □None

**Knowledge related to malignant hyperthermia**

1. The main inheritance mode of malignant hyperthermia（ ）.

A. Autosomal dominant

B. Autosomal recessive inheritance

C. Chromosomal variation

D. Chromosome disease

2. The current specific drugs for treating malignant hyperthermia is（ ）.

A. Human Fibrinogen

B. Human serum albumin

C. Antibiotic

D. Intravenous dantrolene

3. The most typical subtype of malignant hyperthermia is（ ）.

A. Masticatory spasm type

B. Delayed onset type

C. Fulminant type

D. Simple rhabdomyolysis type

4. Malignant hyperthermia is rare in which of the following situations?

A. After using of depolarization neuromuscular blocker succinylcholine

B. Total intravenous anesthesia

C. After using inhalation anesthetics, such as Halothane

D. Induced by high-intensity training

5. The characteristics of malignant hyperthermia do not include which of the following?

A. Rare

B. Developed slowly

C. High mortality rate

D. Rapid progress

6. Susceptibility population of malignant hyperthermia does not include（ ）

A. Patients with idiopathic scoliosis

B. Strabismus patient

C. Patients with blepharoptosis

D. Patients with myasthenia gravis

7. The earliest clinical signs of explosive malignant hyperthermia are often manifested as（ ）

A. An increase in end-tidal carbon dioxide

B. The rapid elevation of body temperature

C. Respiratory acidosis and metabolic acidosis

D. Hyperkalemia, tachycardia and muscle stiffness

8. Which of the following methods does not include for preoperative screening of malignant hyperthermia susceptible individuals?

A. Caffeine-halothane contracture test (CHCT)

B. Family history of MH

C. Genetic testing

D. Serum testing

9. When malignant hyperthermia occurs, the optimal timing for dantrolene administration is （ ）

A. Within 40 minutes

B. Within 30 minutes

C. Within 20 minutes

D. Within 10 minutes

10. Preparation method of domestic dantrolene for injection(20mg/btl)

A. 5%GS 60ml

B. 0.9% sodium chloride solution 60ml

C. Sterile Water for Injection 60ml

D. Sodium lactate ringer's injection 60ml

11. The recommended initial dose of domestic dantrolene is

A. 0.1 mg/kg

B. 0.5 mg/kg

C. 1 mg/kg

D. 5 mg/kg

12. Does your hospital routinely reserve domestic dantrolene at present?

A. Yes

B. No

13. If you chose “No” in the previous question, which way would you choose to obtain dantrolene in case of patients with highly suspected malignant hyperthermia (multiple choices are allowed)

A. Immediately notify the department leader and relevant responsible persons

B. Seek help from China Malignant Hyperthermia Emergency Assistance WeChat-based Group

C. Contact the manufacturer of domestic dantrolene

D. Seek help from well-known domestic experts

E. Temporarily not used, only symptomatic treatment

14. Have there been any cases of malignant hyperthermia in your hospital?

A. Yes

B. No

15. If you chose “Yes” in the previous question, was the case successfully rescued?

A. Successful rescued

B. Unsuccessful rescued

C. Unclear

**Supplementary material B：Number of responding physicians in each province**

| Characteristics | N=11,354 |
| --- | --- |
| **Province, n (%)** |  |
| Beijing | 751(6.6) |
| Hubei | 742(6.5) |
| Shandong | 667(5.9) |
| Henan | 694(6.1) |
| Anhui | 560(4.9) |
| Sichuan | 463(4.1) |
| Hebei | 390(3.4) |
| Gansu | 533(4.7) |
| Shanghai | 462(4.1) |
| Jiangxi | 452(4.0) |
| Shaanxi | 460(4.1) |
| Zhejiang | 441(3.9) |
| Hunan | 386(3.4) |
| Guangxi | 440(3.9) |
| Yunnan | 404(3.6) |
| Heilongjiang | 354(3.1) |
| Fujian | 378(3.3) |
| Chongqing | 336(3.0) |
| Guizhou | 280(2.5) |
| Tianjin | 310(2.7) |
| Hainan | 218(1.9) |
| Jiangsu | 221(1.9) |
| Xinjiang | 247(2.2) |
| Qinghai | 206(1.8) |
| Guangdong | 400(3.5) |
| Liaoning | 160(1.4) |
| Jilin | 137(1.2) |
| Shanxi | 128(1.1) |
| Ningxia | 78(0.7) |
| Tibet | 42(0.4) |
| Inner Mongolia | 14(0.1) |
